# Supplementary material
Source: HighWire-hosted journal article supplement (https://bmjopen.bmj.com/content/12/2/e052246)
Supplement: inline-supplementary-material-1 [file inline-supplementary-material-1.pdf]

## SUPPLEMENTARY MATERIAL

**Supplementary Table 1** Baseline demographics by T2D and tumour subgroups

|                                                     | History of T2D |               | History of tumour |               | Total population<br>(N=57 452) |
|-----------------------------------------------------|----------------|---------------|-------------------|---------------|--------------------------------|
|                                                     | Yes (n=21 817) | No (n=35 635) | Yes (n=24 980)    | No (n=32 472) |                                |
| Age, years, mean±SD                                 | 67.7±12.4      | 65.7±15.0     | 68.8±12.5         | 64.6±14.9     | 66.5±14.1                      |
| Male, n (%)                                         | 12 918 (59.2)  | 16 972 (47.6) | 13 139 (52.6)     | 16 751 (51.6) | 29 890 (52.0)                  |
| Index eGFR, mL/min/1.73 m <sup>2</sup> ,<br>mean±SD | 70.3±23.5      | 72.6±22.7     | 71.7±22.4         | 71.7±23.5     | 71.7±23.0                      |
| ECI, mean±SD                                        | 4.3±7.9        | 6.2±7.7       | 10.2±8.4          | 1.9±4.9       | 5.5±7.8                        |
| History of comorbidities, n (%)                     |                |               |                   |               |                                |
| Asthma                                              | 1652 (7.6)     | 2594 (7.3)    | 1398 (5.6)        | 2848 (8.8)    | 4246 (7.4)                     |
| COPD                                                | 404 (1.9)      | 720 (2.0)     | 498 (2.0)         | 626 (1.9)     | 1124 (2.0)                     |
| Dementia                                            | 489 (2.2)      | 614 (1.7)     | 347 (1.4)         | 756 (2.3)     | 1103 (1.9)                     |
| Depression                                          | 717 (3.3)      | 1234 (3.5)    | 777 (3.1)         | 1174 (3.6)    | 1951 (3.4)                     |
| Hyperlipidaemia                                     | 11 717 (53.7)  | 9094 (25.5)   | 5224 (20.9)       | 15 587 (48.0) | 20 811 (36.2)                  |
| Hypertension                                        | 13 509 (61.9)  | 13 539 (38.0) | 8933 (35.8)       | 18 115 (55.8) | 27 048 (47.1)                  |
| Cardiovascular disease                              | 5089 (23.3)    | 4112 (11.5)   | 3234 (13.0)       | 5967 (18.4)   | 9201 (16.0)                    |

|                          |                |               |                |               |               |
|--------------------------|----------------|---------------|----------------|---------------|---------------|
| Tumour                   | 7406 (34.0)    | 17 574 (49.3) | 24 980 (100.0) | 0 (0.0)       | 24 980 (43.5) |
| Deficiency anaemia       | 2592 (11.9)    | 4500 (12.6)   | 3921 (15.7)    | 3171 (9.8)    | 7092 (12.3)   |
| T2D                      | 21 817 (100.0) | 0 (0.0)       | 7406 (29.7)    | 14 411 (44.4) | 21 817 (38.0) |
| Medication use, n (%)    |                |               |                |               |               |
| Anti-arrhythmia          | 287 (1.3)      | 408 (1.1)     | 229 (0.92)     | 466 (1.4)     | 695 (1.2)     |
| Anti-coagulant           | 711 (3.3)      | 1067 (3.0)    | 516 (2.1)      | 1262 (3.9)    | 1778 (3.1)    |
| Anti-diabetes            | 12 293 (56.4)  | 417 (1.2)     | 3215 (12.9)    | 9495 (29.2)   | 12 710 (22.1) |
| Anti-hypertensive        | 11 722 (53.7)  | 11 542 (32.4) | 7084 (28.4)    | 16 180 (49.8) | 23 264 (40.5) |
| Anti-platelet            | 2772 (12.7)    | 1827 (5.1)    | 1286 (5.2)     | 3313 (10.2)   | 4599 (8.0)    |
| Bronchodilator           | 1002 (4.6)     | 1772 (5.0)    | 990 (4.0)      | 1784 (5.5)    | 2774 (4.8)    |
| Diuretics                | 1280 (5.9)     | 1408 (4.0)    | 1504 (6.0)     | 1184 (3.7)    | 2688 (4.7)    |
| Beta blockers            | 1555 (7.1)     | 1523 (4.3)    | 781 (3.1)      | 2297 (7.1)    | 3078 (5.4)    |
| Calcium channel blockers | 7094 (32.5)    | 6991 (19.6)   | 4225 (16.9)    | 9860 (30.4)   | 14 085 (24.5) |
| Iron                     | 1015 (4.7)     | 1814 (5.1)    | 1530 (6.1)     | 1299 (4.0)    | 2829 (4.9)    |
| RAAS inhibitors          | 10 814 (49.6)  | 10 065 (28.2) | 5847 (23.4)    | 15 032 (46.3) | 20 879 (36.3) |

COPD, chronic obstructive pulmonary disease; ECI, Elixhauser Comorbidity Index; eGFR, estimated glomerular filtration rate; RAAS, renin-angiotensin-aldosterone system;

SD, standard deviation; T2D, type 2 diabetes.

**Supplementary Table 2** Subgroup analyses: risk of outcomes by eGFR slope category – by tumour at baseline, no tumour at baseline, history of diabetes at baseline and no history of diabetes at baseline

| Outcome                   | eGFR slope category,<br>mL/min/1.73 m <sup>2</sup> /year | HR (95% CI)*     |                            |                 |                   |                 |
|---------------------------|----------------------------------------------------------|------------------|----------------------------|-----------------|-------------------|-----------------|
|                           |                                                          | Total population | History of type 2 diabetes |                 | History of tumour |                 |
|                           |                                                          |                  | Yes                        | No              | Yes               | No              |
| Cardiovascular mortality  | ≤-5 (rapid eGFRdec group)                                | 2.6 (1.6, 4.3)†  | 2.2 (1.0, 4.5)†            | 2.9 (1.4, 5.9)† | 3.2 (1.7, 6.1)†   | 1.8 (0.7, 4.4)  |
|                           | >-5 to ≤-3                                               | 1.0 (0.6, 1.7)   | 0.6 (0.2, 1.4)             | 1.4 (0.7, 3.1)  | 1.1 (0.5, 2.3)    | 0.9 (0.4, 2.3)  |
|                           | >-3 to ≤-1                                               | 1.0 (0.6, 1.7)   | 0.9 (0.4, 1.8)             | 1.2 (0.6, 2.3)  | 0.9 (0.4, 1.7)    | 1.2 (0.6, 2.5)  |
|                           | >-1 to ≤1                                                | 1.0              | 1.0                        | 1.0             | 1.0               | 1.0             |
|                           | >1 to ≤3                                                 | 0.9 (0.4, 1.8)   | 0.8 (0.3, 2.3)             | 0.9 (0.4, 2.4)  | 1.2 (0.5, 3.0)    | 0.5 (0.1, 1.8)  |
|                           | >3 (rapid eGFRinc group)                                 | 1.3 (0.7, 2.2)   | 0.9 (0.4, 2.1)             | 1.7 (0.8, 3.7)  | 1.6 (0.8, 3.2)    | 0.8 (0.3, 2.2)  |
| All-cause mortality‡      | ≤-5 (rapid eGFRdec group)                                | 2.8 (1.9, 4.2)†  | 2.0 (1.1, 3.8)†            | 3.4 (2.0, 5.9)† | 3.4 (2.1, 5.6)†   | 2.3 (1.0, 5.0)† |
|                           | >-5 to ≤-3                                               | 1.3 (0.8, 2.1)   | 0.9 (0.4, 1.8)             | 1.7 (0.9, 3.2)  | 1.4 (0.8, 2.6)    | 1.4 (0.6, 3.1)  |
|                           | >-3 to ≤-1                                               | 1.0 (0.7, 1.6)   | 0.9 (0.5, 1.7)             | 1.2 (0.6, 2.0)  | 0.8 (0.5, 1.5)    | 1.5 (0.7, 2.9)  |
|                           | >-1 to ≤1                                                | 1.0              | 1.0                        | 1.0             | 1.0               | 1.0             |
|                           | >1 to ≤3                                                 | 0.8 (0.4, 1.3)   | 0.5 (0.2, 1.3)             | 0.9 (0.4, 1.9)  | 1.0 (0.5, 2.0)    | 0.5 (0.2, 1.5)  |
|                           | >3 (rapid eGFRinc group)                                 | 1.5 (0.9, 2.3)   | 0.7 (0.4, 1.5)             | 2.4 (1.3, 4.3)† | 1.8 (1.1, 3.2)†   | 0.9 (0.4, 2.1)  |
| All-cause hospitalisation | ≤-5 (rapid eGFRdec group)                                | 1.8 (1.5, 2.1)†  | 1.9 (1.5, 2.5)†            | 1.7 (1.3, 2.1)† | 1.8 (1.4, 2.3)†   | 1.7 (1.3, 2.2)† |

|                           |                           |                 |                 |                 |                 |                 |
|---------------------------|---------------------------|-----------------|-----------------|-----------------|-----------------|-----------------|
|                           | >−5 to ≤−3                | 1.4 (1.2, 1.7)† | 1.6 (1.2, 2.1)† | 1.3 (1.0, 1.6)† | 1.1 (0.9, 1.5)  | 1.8 (1.4, 2.3)† |
|                           | >−3 to ≤−1                | 1.1 (0.9, 1.3)  | 1.1 (0.9, 1.4)  | 1.1 (0.9, 1.4)  | 1.0 (0.8, 1.2)  | 1.3 (1.0, 1.5)  |
|                           | >−1 to ≤1                 | 1.0             | 1.0             | 1.0             | 1.0             | 1.0             |
|                           | >1 to ≤3                  | 0.9 (0.7, 1.2)  | 0.9 (0.6, 1.3)  | 1.0 (0.7, 1.3)  | 1.1 (0.8, 1.5)  | 0.8 (0.6, 1.1)  |
|                           | >3 (rapid eGFRinc group)  | 1.1 (0.9, 1.4)  | 1.0 (0.7, 1.4)  | 1.4 (1.1, 1.8)  | 1.3 (1.0, 1.8)  | 0.8 (0.6, 1.2)  |
| Any cardiovascular event§ | ≤−5 (rapid eGFRdec group) | 1.8 (1.4, 2.2)† | 2.0 (1.5, 2.7)† | 1.5 (1.1, 2.1)† | 1.7 (1.2, 2.3)† | 1.9 (1.4, 2.5)† |
|                           | >−5 to ≤−3                | 1.6 (1.3, 2.0)† | 1.7 (1.3, 2.4)† | 1.5 (1.1, 2.0)† | 1.3 (0.9, 1.8)  | 2.0 (1.5, 2.7)† |
|                           | >−3 to ≤−1                | 1.2 (1.0, 1.5)† | 1.2 (0.9, 1.6)  | 1.2 (0.9, 1.6)  | 1.2 (0.9, 1.6)  | 1.3 (1.0, 1.6)  |
|                           | >−1 to ≤1                 | 1.0             | 1.0             | 1.0             | 1.0             | 1.0             |
|                           | >1 to ≤3                  | 0.8 (0.6, 1.1)  | 0.8 (0.5, 1.2)  | 0.9 (0.6, 1.3)  | 1.2 (0.8, 1.8)  | 0.6 (0.4, 0.9)  |
|                           | >3 (rapid eGFRinc group)  | 1.2 (0.9, 1.5)  | 1.2 (0.8, 1.8)  | 1.2 (0.9, 1.8)  | 1.4 (0.9, 2.1)  | 0.9 (0.6, 1.3)  |
| Any kidney event¶         | ≤−5 (rapid eGFRdec group) | 1.5 (0.9, 2.5)  | 2.1 (1.1, 4.3)† | 0.9 (0.4, 1.8)  | 0.5 (0.2, 1.3)  | 2.3 (1.3, 4.2)† |
|                           | >−5 to ≤−3                | 2.1 (1.3, 3.4)† | 2.6 (1.3, 5.2)† | 1.7 (0.8, 4.0)  | 0.3 (0.1, 1.1)  | 3.1 (1.7, 5.6)† |
|                           | >−3 to ≤−1                | 1.9 (1.2, 2.9)† | 1.5 (0.8, 3.0)  | 2.3 (1.3, 4.3)† | 0.8 (0.3, 1.6)  | 3.2 (1.8, 5.7)† |
|                           | >−1 to ≤1                 | 1.0             | 1.0             | 1.0             | 1.0             | 1.0             |
|                           | >1 to ≤3                  | 0.2 (0.0, 0.6)  | 0.2 (0.0, 1.0)  | 0.1 (0.0, 1.0)  | 0.3 (0.0, 1.7)  | 0.1 (0.0, 0.6)  |
|                           | >3 (rapid eGFRinc group)  | 0.5 (0.1, 2.2)  | 0.3 (0.0, 2.5)  | 0.7 (0.1, 4.2)  | 0.4 (0.0, 3.3)  | 0.6 (0.1, 3.9)  |

\*Cox proportional hazard model for time-to-event, adjusted for age, sex, medical history, BL type 2 diabetes status, BL ECI score, BL medication use and index eGFR value, with interaction terms for slope categories. Categories 2-6 (eGFR slopes:  $\leq -5$ ,  $> -5$  to  $\leq -3$ ,  $> -3$  to  $\leq -1$ ,  $> 1$  to  $\leq 3$ ,  $> 3$ ) were analysed by outcome, with Category 1 (slope  $> -1$  to  $\leq 1$ ) as reference.

†Statistically significant HRs.

‡Based on inpatient death data.

§ Stroke, chronic heart failure or myocardial infarction.

¶End-stage kidney disease, dialysis, acute kidney failure or kidney transplant.

BL, baseline; ECI, Elixhauser Comorbidity Index; eGFR, estimated glomerular filtration rate; eGFRdec, eGFR decliner; eGFRinc, eGFR increaser; HR, hazard ratio.
